# Supplementary material for: Collateral sensitivity constrains resistance evolution of the CTX-M-15 β-lactamase
Source: PubMed Central journal article supplement (PMC6365502; doi:10.1038/s41467-019-08529-y), 2019-02-06
Supplement: 41467_2019_8529_MOESM1_ESM.pdf [file 41467_2019_8529_MOESM1_ESM.pdf]

Collateral sensitivity constrains the resistance evolution  
of the CTX-M-15  $\beta$ -lactamase

Rosenkilde and Munck et al.

Supplementary information

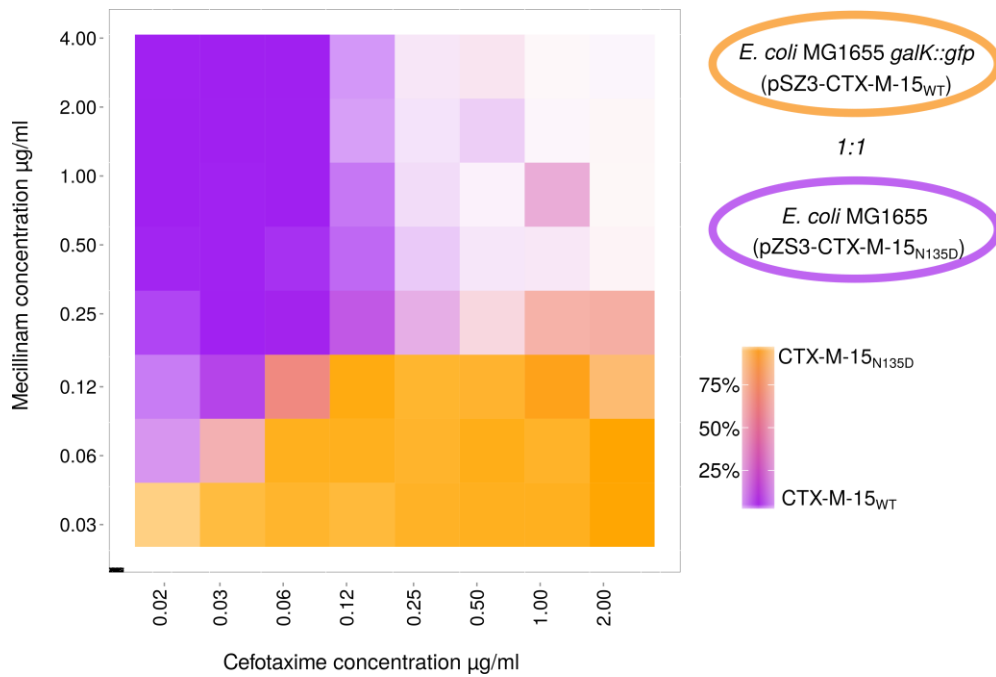

**Supplementary Figure 1. 2D growth of CTX-M-15<sub>N135D</sub> and CTX-M-15<sub>WT</sub>.** A GFP tag was placed on *E. coli* MG1655 expressing either CTX-M-15<sub>WT</sub> or CTX-M-15<sub>N135D</sub> to verify that the GFP tag did not influence the growth results. *E. coli* MG1655 *galK::gfp* (pSZ3-CTX-M-15<sub>WT</sub>) was mixed with *E. coli* MG1655 (pSZ3-CTX-M-15<sub>N135D</sub>) in a 1:1 ratio and grown in a 2D gradient of mecillinam versus cefotaxime. Each square represents a well, and the colour represents the amount of either labelled CTX-M-15<sub>N135D</sub> (orange) or non-labelled CTX-M-15<sub>WT</sub> (purple). Darker colour indicates higher total cell count and lighter colour indicate lower cell count. The highest concentrations corresponded to mecillinam 4x MIC for CTX-M-15<sub>WT</sub> and cefotaxime 2x MIC for CTX-M-15<sub>N135D</sub>.

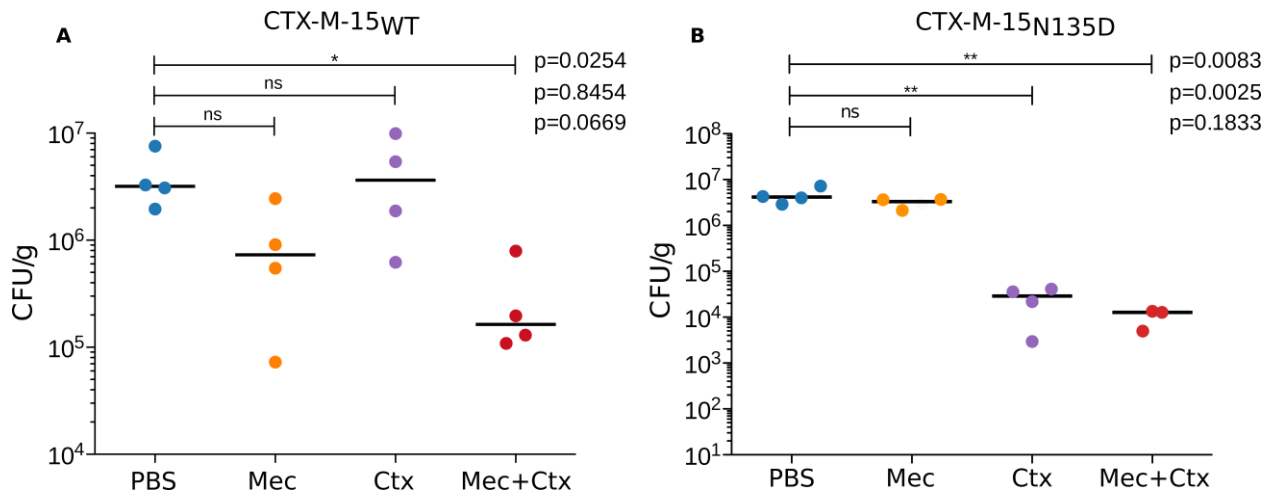

**Supplementary Figure 2. Bacterial counts from mice infected with CTX-M-15<sub>WT</sub> or**

**CTX-M-15<sub>N135D</sub>.** Mice infected via intraperitoneal injection with *S. Typhimurium* expressing either CTX-M-15<sub>WT</sub> strain (A) or the mutant strain carrying CTX-M-15<sub>N135D</sub> (B) were treated with mecillinam (Mec), cefotaxime (Ctx), or a combination of the two. PBS was used as a negative control. Bacterial counts from spleen (colony-forming units (CFU)/g) are shown (4 mice per group). Inoculum size was  $1.5 \times 10^5$  CFU/mouse. ns: not significant; \* $p < 0.05$ ; \*\* $p < 0.01$ . Horizontal bold line denotes the median. Statistical analysis was performed using unpaired Student's *t* test. One mouse infected with the mutant CTX-M-15<sub>N135D</sub> and treated with mecillinam in combination with cefotaxime cleared the infection. Data from this mouse are not plotted.

| Strain              | pipTZB | Mecillinam | mecTZB | mecCLA | amoCLA | Cefotaxime | Meropenem | Piperacillin |
|---------------------|--------|------------|--------|--------|--------|------------|-----------|--------------|
| pZS3 empty vector   | 0.6    | 0.19       | 0.88   | 1.4    | 6.8    | <2         | 0.07      | 22           |
| CTX-M-15 WT         | 1.6    | 0.3        | 0.9    | 1.4    | 14     | 23         | 0.07      | 879          |
| S133G               | 13     | 0.2        | 0.5    | 1.4    | 104    | <2         | 0.07      | 472          |
| N135D               | 1.3    | 15         | 2.9    | 5.5    | 7      | <2         | 0.08      | 156          |
| G239S               | 7.3    | 0.4        | 0.4    | 1.4    | 19     | <2         | 0.08      | 208          |
| S133G+N135D         | 12     | 0.3        | 1      | 1.8    | 18     | <2         | 0.07      | 482          |
| S133G+G239S         | 0.7    | 0.5        | 1.4    | 2.7    | 7.7    | <2         | 0.07      | 31           |
| N135D+G239S         | 0.7    | 0.19       | 1.3    | 1.3    | 7      | <2         | 0.07      | 23.5         |
| Clinical breakpoint | 8      | 8          | ND     | ND     | 8      | 2          | 8         | 16           |

**Supplementary Table 1. MIC values ( $\mu\text{g/ml}$ ) for the CTX-M-15<sub>WT</sub> and CTX-M-15**

**mutants.** All MIC values are based on expression in *E. coli* TOP10 and given in  $\mu\text{g/ml}$ .

Ratios of inhibitor to antibiotic were as follows (concentrations in parenthesis is the concentration at 1x MIC for CTX-M-15<sub>WT</sub> and concentrations of inhibitor is listed after): piperacillin-tazobactam (pipTZB), 8:1 (4  $\mu\text{g/ml}$ ); mecillinam-tazobactam (mecTZB), 1:2 (0.25/0.44  $\mu\text{g/ml}$ ); mecillinam-clavulanic acid (mecCLA), 1:6.4 (0.25/1.6  $\mu\text{g/ml}$ ); amoxicillin-clavulanic acid (amoCLA), 4:1 (8  $\mu\text{g/ml}$ ), concentrations for drugs without inhibitor (at 1x CTX-M-15<sub>WT</sub> MIC): mecillinam: 0.25  $\mu\text{g/ml}$ , meropenem: 0.06  $\mu\text{g/ml}$ , piperacillin (256  $\mu\text{g/ml}$ ): ND: no data on the clinical breakpoint for this antibiotic-inhibitor combination. Clinical breakpoint source: [clincalc.com/eucast/](http://clincalc.com/eucast/)

| <b>MIC</b> | <b>PIP-TZB</b> | <b>Mecillinam</b> | <b>Meropenem</b> | <b>Ceftazidime</b> |
|------------|----------------|-------------------|------------------|--------------------|
| 0.5        | Lawn           | Lawn              | >1000            | -                  |
| 0.75       | Lawn           | >1000             | 0                | -                  |
| 1          | Lawn           | 92                | 0                | -                  |
| 2          | >1000          | 0                 | 0                | >1000              |
| 4          | 5              | 0                 | 0                | No cells           |

**Supplementary Table 2. CFU count of CTX-M-15<sub>WT</sub> screened on various antibiotics.**

Numbers correspond to CFU on a plate and is an average of 2 replicate plates. No cells, no cells grew on this plate -, not tested. Lawn represents a plate covered in indistinct colonies, ~, CFU was estimated. PIP-TZB: piperacillin-tazobactam. Ceftazidime: positive control

| <b>MIC</b> | <b>PIP-TZB</b> | <b>Mecillinam</b> | <b>Meropenem</b> | <b>Ceftazidime</b> |
|------------|----------------|-------------------|------------------|--------------------|
| 0.5        | Lawn           | Lawn              | >1000            | -                  |
| 0.75       | Lawn           | >1000             | 0                | -                  |
| 1          | Lawn           | >1000             | 0                | -                  |
| 2          | >1000          | ~1000             | 0                | >1000              |
| 4          | ~1000          | ~1000             | 0                | ~100               |

**Supplementary Table 3. CFU count of CTX-M-15 mutant library screened on various**

**antibiotics.** Numbers correspond to CFU on a plate and is averaged over 4 replicate plates.

Mutant library Mut2Vol2 was used. -, not tested. Lawn represents a plate covered in

indistinct colonies, ~, CFU was estimated. PIP-TZB: piperacillin-tazobactam. Ceftazidime:

positive control

| <b>Primer name</b>    | <b>Sequenced</b>                        | <b>Purpose</b>                      |
|-----------------------|-----------------------------------------|-------------------------------------|
| CTX-M-15-F            | AAAGTCGAC-ATGGTTAAAAAATCACTGCG          | CTX_M-15 amplification              |
| CTX-M-15-R            | AAAAGCTT-TTACAAACCGTCGGTGACG            | CTX_M-15 amplification              |
| gblok-CTX-M-15-F      | GAGGAGGTAAAAGAGGTTCG                    | Error-prone PCR                     |
| gblok-CTX-M-15-R      | GCAGGAATTCGATATCAAGC                    | Error-prone PCR                     |
| pZ-insert-F           | GCGAAACGATCCTCATCC                      | Geneblock amplification             |
| CM-insert-NotI-R      | CGCCGCAGCCGAACG                         | Geneblock amplification             |
| AscI-CTX-M-15-F       | AAAGTTAAAC-<br>GAGGAGGTAAAAGAGGTTCG     | Amplification of error-prone<br>PCR |
| PmeI-CTX-M-15-R       | AAAGGCGCGCC-<br>GCAGGAATTCGATATCAAGC    | Amplification of error-prone<br>PCR |
| Ancestral-pZS3-F      | CATCCCCCTAGCATAAC                       | Amplification of pZS3 bb            |
| Ancestral-pZS3-R      | ATATTATTGAAGCATTTATCAGG                 | Amplification of pZS3 bb            |
| PmeI-Ancestral-pZS3-F | AAAGTTTAAAC-CATCCCCCTAGCATAAC           | Amplification of pZS3 bb            |
| AscI-Ancestral-pZS3-R | AAAGGCGCGCC-<br>ATATTATTGAAGCATTTATCAGG | Amplification of pZS3 bb            |
| Mut397F               | 5'P CGCTACAGTACGGCGATAAC 3'             | Creation of mutant                  |
| Mut397R               | 5' CGGCCGCGCTAAGCT 3'                   | Creation of mutant                  |
| Mut403F               | 5'P GATGACGTGGCGATGA 3'                 | Creation of mutant                  |
| Mut403R               | 5' GCTGTACTGTAGCGCG 3'                  | Creation of mutant                  |
| Mut715F               | 5'P GGGATAAAACCAGCAG 3'                 | Creation of mutant                  |
| Mut715R               | 5' CCACAACCCAGGAAGC 3'                  | Creation of mutant                  |
| Chee-pZ-seq-F         | CAAATATGTATCCGCTCATG                    | Illumina sequencing                 |
| Chee-pZ-seq-R         | AAAAAACCCTCAAGACCC                      | Illumina sequencing                 |

**Supplementary Table 4. Primers used in this study**
