# Supplementary material for: Collateral sensitivity constrains resistance evolution of the CTX-M-15 β-lactamase
Source: PubMed Central journal article supplement (PMC6365502; doi:10.1038/s41467-019-08529-y), 2019-02-06
Supplement: 41467_2019_8529_MOESM5_ESM.pdf [file 41467_2019_8529_MOESM5_ESM.pdf]

## **Description of Additional Supplementary Files**

File Name: Supplementary Data 1

Description: The complete sequence of the *bla*<sub>CTX-M-15</sub> gene and the  $\beta$ -lactamase promoter.
